# Supplementary material
Source: publisher site journal article supplement (https://www.dovepress.com/article/360433)
Supplement: Supplementary file 1 [file get_supplementary_file.php]

**SUPPLEMENT**

**Supplemental Results**

***Sleep in the experimental sleep condition***

Participants’ time needed to fall asleep, the time spent in different sleep stages, and the total sleep duration in the experimental sleep condition are summarized in *Supplementary Table S1*.

***Total number of fixation points (TFP)***

As demonstrated by the GLMM, a main effect on TFP for the whole face was found for SLEEP (sleep loss vs. sleep, 11.9 [11.6, 12.2] vs. 13.6 [13.4, 13.9]; p<0.0001) but not EMOTION (happy vs. fearful vs. angry vs. neutral faces: 12.8 [12.4, 13.2] vs. 12.7 [12.3, 13.1] vs. 12.7 [12.3, 13.1] vs. 12.9 [12.5, 13.3]; p=0.946). The interaction between SLEEP and EMOTION did not reach significance for TFP for the whole face (p=0.930; *Supplementary Table S2*).

When restricting the analysis to TFP on the upper part of the face, the GLMM showed main effects for SLEEP (sleep loss vs. sleep, 8.1 [7.8, 8.3] vs. 9.4 [9.2, 9.7]; p<0.0001) and EMOTION (happy vs. fearful vs. angry vs. neutral faces: 8.5 [8.1, 8.9] vs. 8.5 [8.1, 8.8] vs. 9.1 [8.8, 9.5] vs. 9.0 [8.6, 9.3]; p=0.015). No significant SLEEP*EMOTION interaction was found (p=0.940; *Supplementary Table S2*).

When analyzing the TFP for the lower part of the face, we found a main effect for SLEEP (sleep loss vs. sleep: 3.7 [3.6, 3.9] vs. 4.2 [4.0, 4.3]; p=0.001) and for EMOTION (happy vs. fearful vs. angry vs. neutral faces: 4.2 [3.9, 4.4] vs. 4.2 [3.9, 4.4] vs. 3.5 [3.3, 3.8] vs. 3.9 [3.6, 4.1], p<0.001). No interaction was found of SLEEP with EMOTION for the TFP for the lower part of the face (P=0.653; *Supplementary Table S2*).

**Supplementary Table S1: Sleep in the experimental sleep condition**

|  | **hh:mm ± hh:mm** |
| --- | --- |
| **Total sleep time** | 07:12 ± 00:31 |
| **Sleep onset latency** | 00:28 ± 00:20 |
| **Wake after sleep onset** | 00:25 ± 00:25 |
| **Non-REM sleep stage N1** | 00:19 ± 00:11 |
| **Non-REM sleep stage N2** | 03:33 ± 00:30 |
| **Non-REM sleep stage N3** | 01:46 ± 00:23 |
| **REM sleep stage** | 01:32 ± 00:19 |

**Notes**: Times are shown as mean ± SD. Subjective sleep quality ratings in the morning after the experimental sleep night did not differ between those with successful polysomnography (PSG) sleep recordings (n=36) and those where PSG recordings were not scoreable due to technical issues (n=7; p=0.816, as derived from an independent Student’s t-test). Abbreviations: REM, rapid-eye-movement.

**Supplementary Table S2: Total number of fixation points following sleep loss and sleep**

| **Facial area** | **Facial expression** | **Sleep loss** | **Sleep** |
| --- | --- | --- | --- |
| Whole face | Happy | 11.8 [11.2, 12.4] *** | 13.7 [13.2, 14.2] |
| Fearful | 11.8 [11.3, 12.4] *** | 13.6 [13.1, 14.1] |
| Angry | 11.8 [11.2, 12.4] *** | 13.6 [13.1, 14.1] |
| Neutral | 12.1 [11.5, 12.7] *** | 13.6 [13.1, 14.2] |
|  |  |  |  |
| Upper part of the face, including the eyes | Happy | 7.7 [7.2, 8.2] *** | 9.3 [8.8, 9.7] |
| Fearful | 7.8 [7.3, 8.3] *** | 9.2 [8.7, 9.6] |
| Angry | 8.5 [8.0, 9.0] ** | 9.7 [9.3, 10.2] |
| Neutral | 8.3 [7.8, 8.8] *** | 9.6 [9.2, 10.1] |
|  |  |  |  |
| Lower part of the face, including the mouth | Happy | 4.0 [3.6, 4.3] | 4.4 [4.1, 4.8] |
| Fearful | 4.0 [3.6, 4.4] | 4.4 [4.0, 4.7] |
| Angry | 3.2 [2.9, 3.6] ** | 3.9 [3.5, 4.2] |
| Neutral | 3.8 [3.4, 4.2] | 4.0 [3.7, 4.3] |

**Notes**: Values are shown as estimated marginal means [95%-CI]. Post hoc testing was performed using pairwise comparisons using Student’s t-tests with LSD adjustment for multiple comparisons.

** p<0.01; *** p<0.001.
